# Supplementary material
Source: PubMed Central journal article supplement (PMC6795380)
Supplement: jciinsight-4-126345-s040.pdf [file jciinsight-4-126345-s040.pdf]

## Supplement

### Supplemental Figures and Supplemental Figure legends

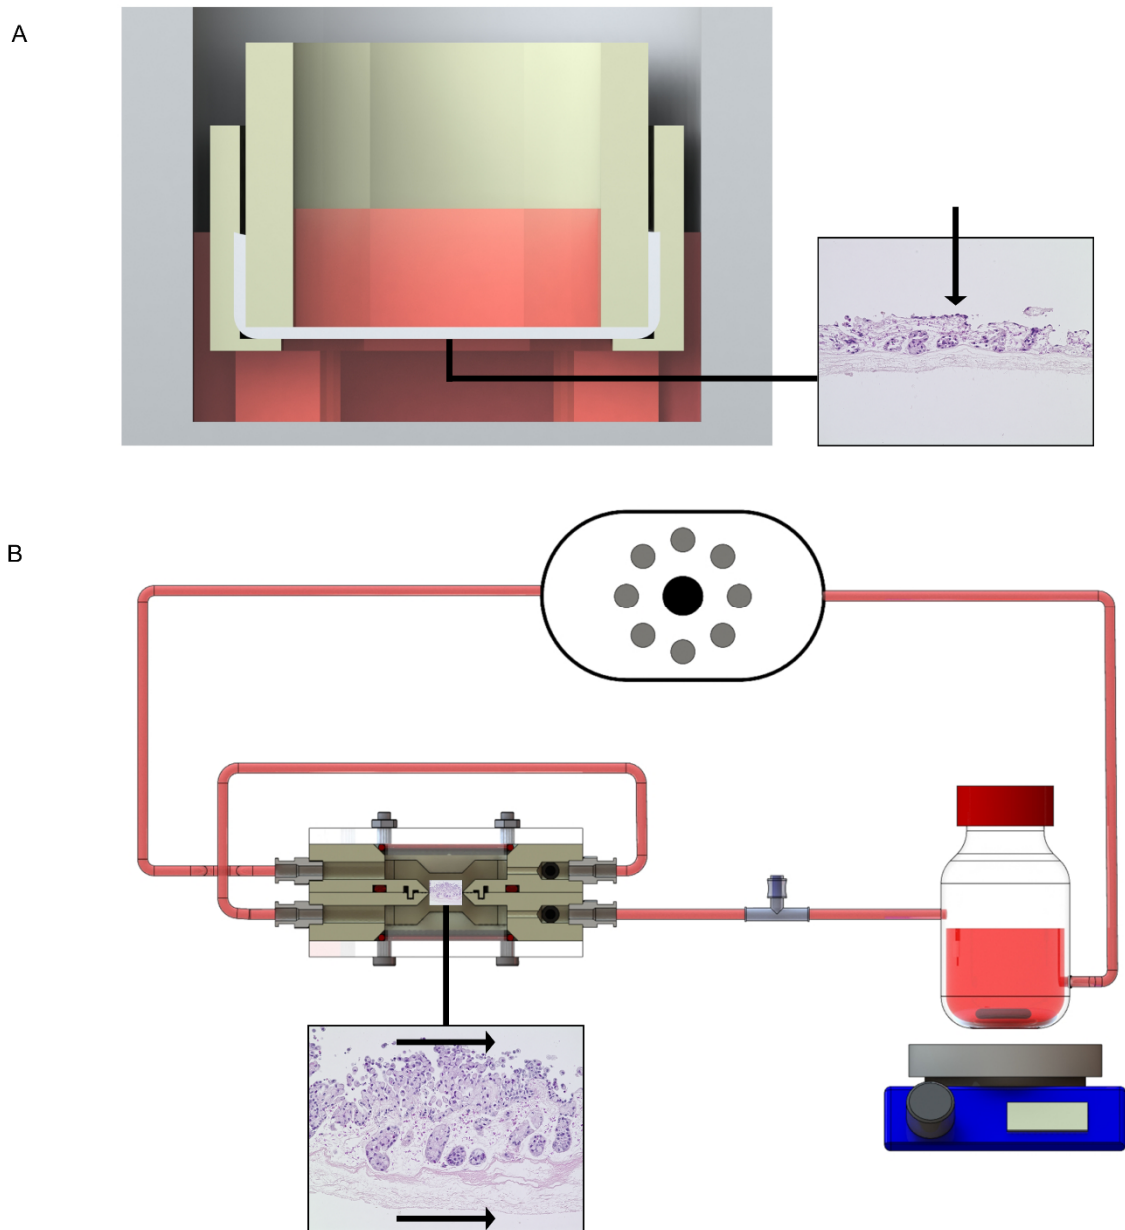

**Supplemental Figure 1. Experimental set-up of static and dynamic 3D lung cancer and breast cancer models. A,** In static culture, the SISmuc scaffold is fixed between two tailored metal rings (cell crown). T-cells are applied to the inner compartment of the cell crown and thus reach the 3D tumor cells from the top (arrow). **B,** In dynamic culture, medium is continuously pumped through the tubing set by a peristaltic pump. T-cells are applied to the medium reservoir, and can assess the tumor tissue through the tubing system.

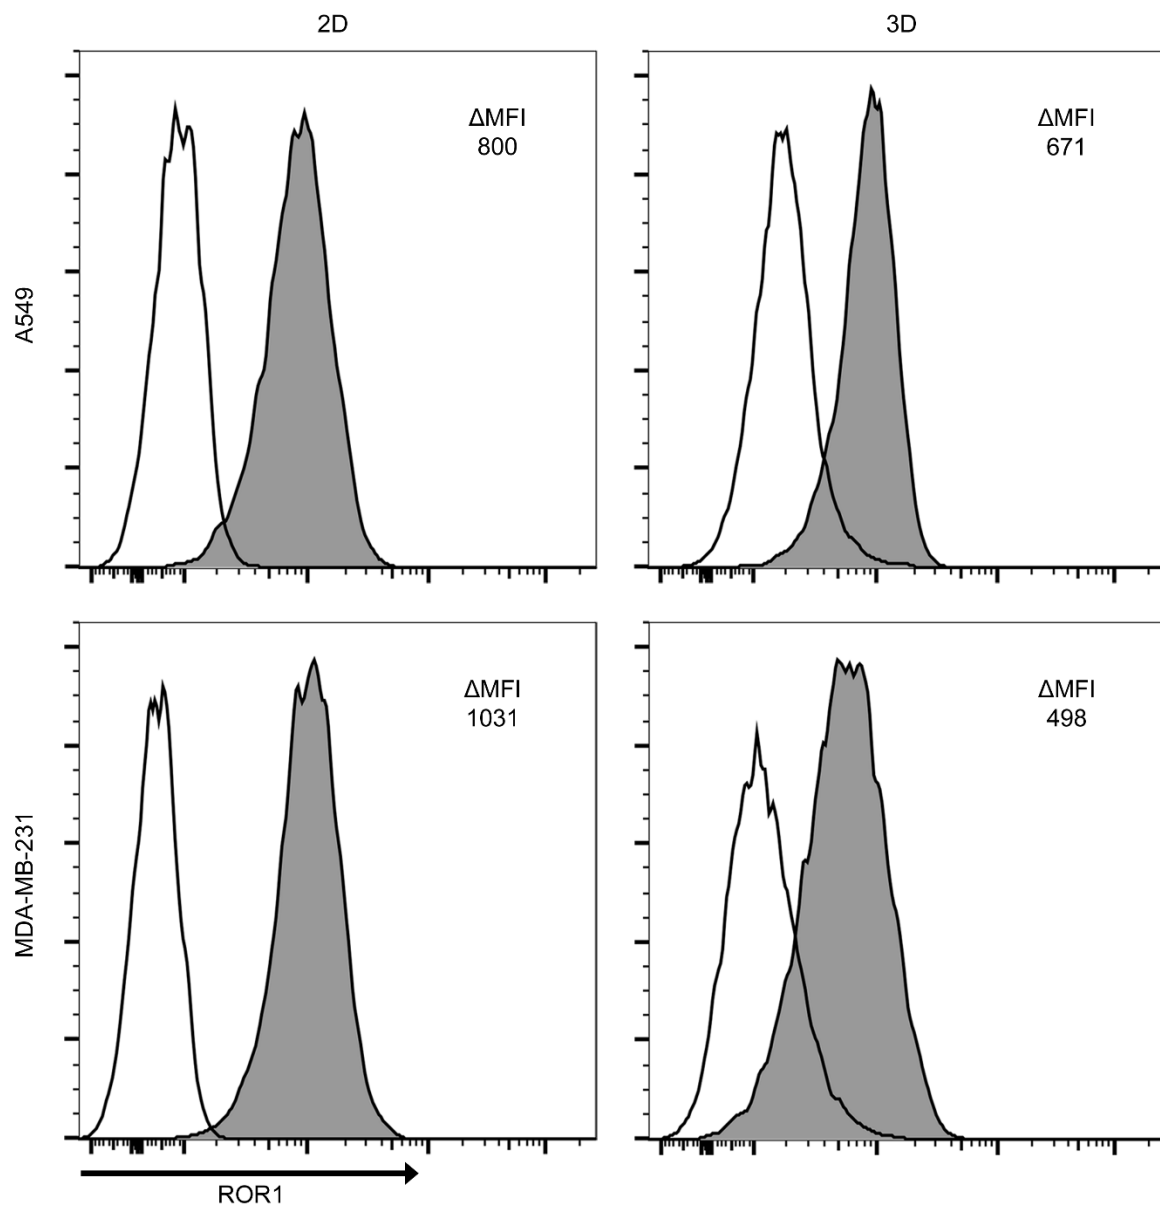

**Supplemental Figure 2. ROR1 expression on tumor cell lines in 2D and 3D conditions.** ROR1 expression on A549 and MDA-MB-231 tumor cells under conventional 2D culture conditions (2D) or static 3D culture (3D) was assessed by flow cytometric analysis.  $\Delta$ MFI depicts the difference between fluorochrome conjugated anti-ROR1 antibody and isotype control. One representative of two experiments is shown.

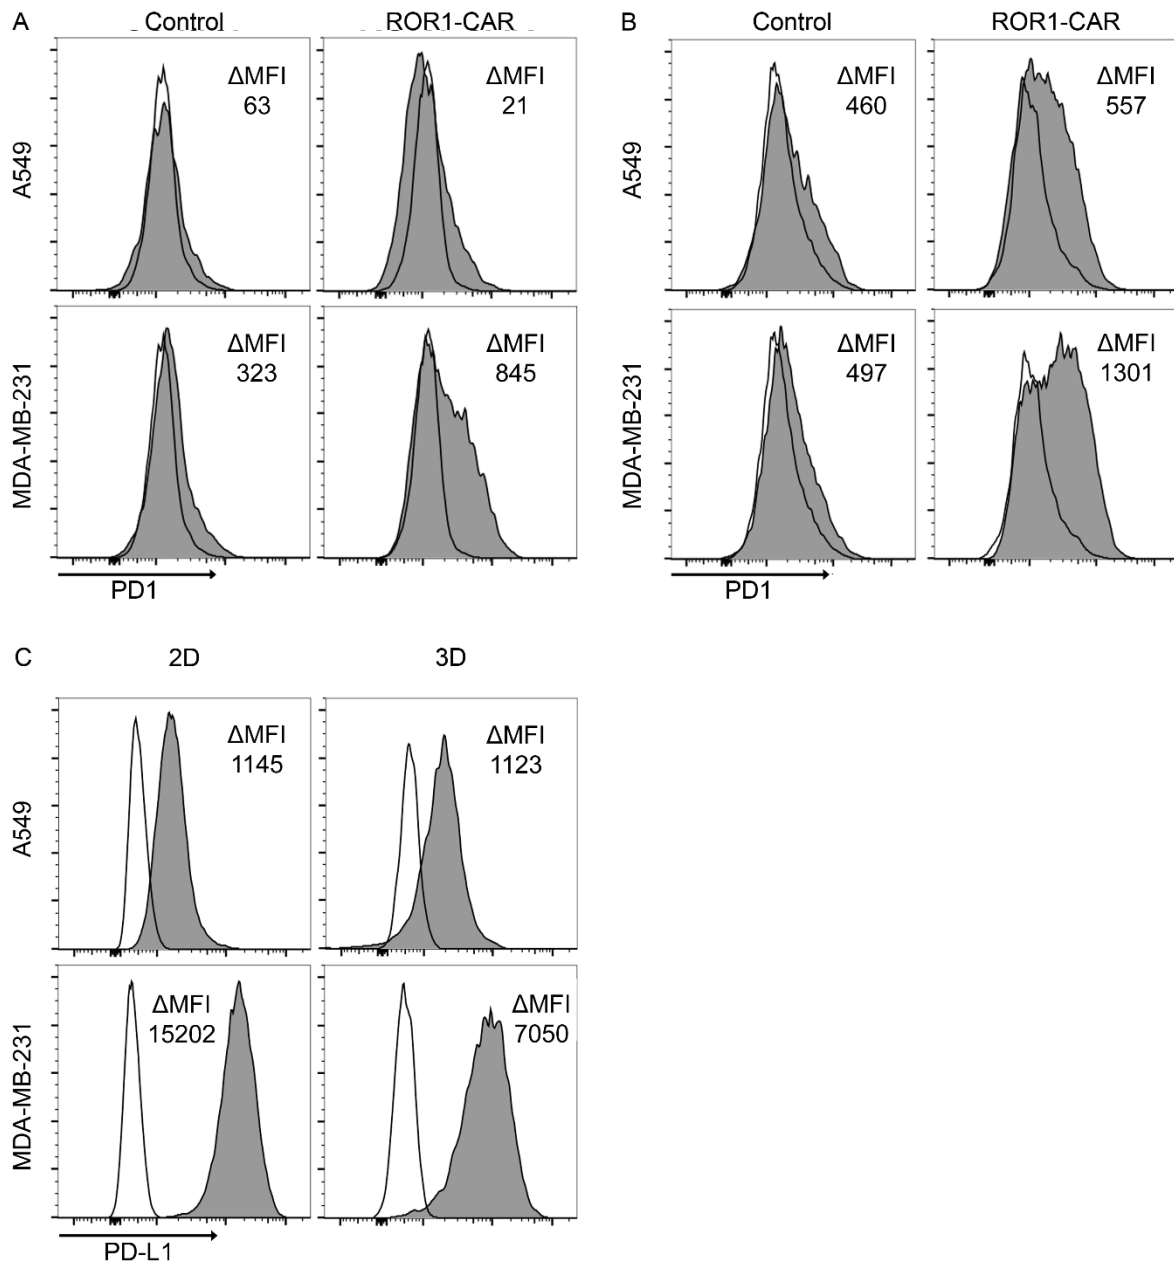

**Supplemental Figure 3. PD-1 expression on T-cells and PD-L1 expression on tumor cells. A,** Expression of PD-1 on CD8<sup>+</sup> T-cells and **B,** on CD4<sup>+</sup> T-cells after 72 h treatment in static 3D culture. n=1,  $\Delta$ MFI depicts the difference in geometric mean fluorescence intensity between T-cells from 3D culture and T-cells in medium. **C,** Expression of PD-L1 on tumor cells obtained from conventional 2D culture (left histograms) and tumor cells that were re-isolated from static 3D tumor models (right histograms) was analyzed by flow cytometry. n=1,  $\Delta$ MFI depicts the difference between fluorochrome-conjugated anti-PD-L1 antibody and isotype control.

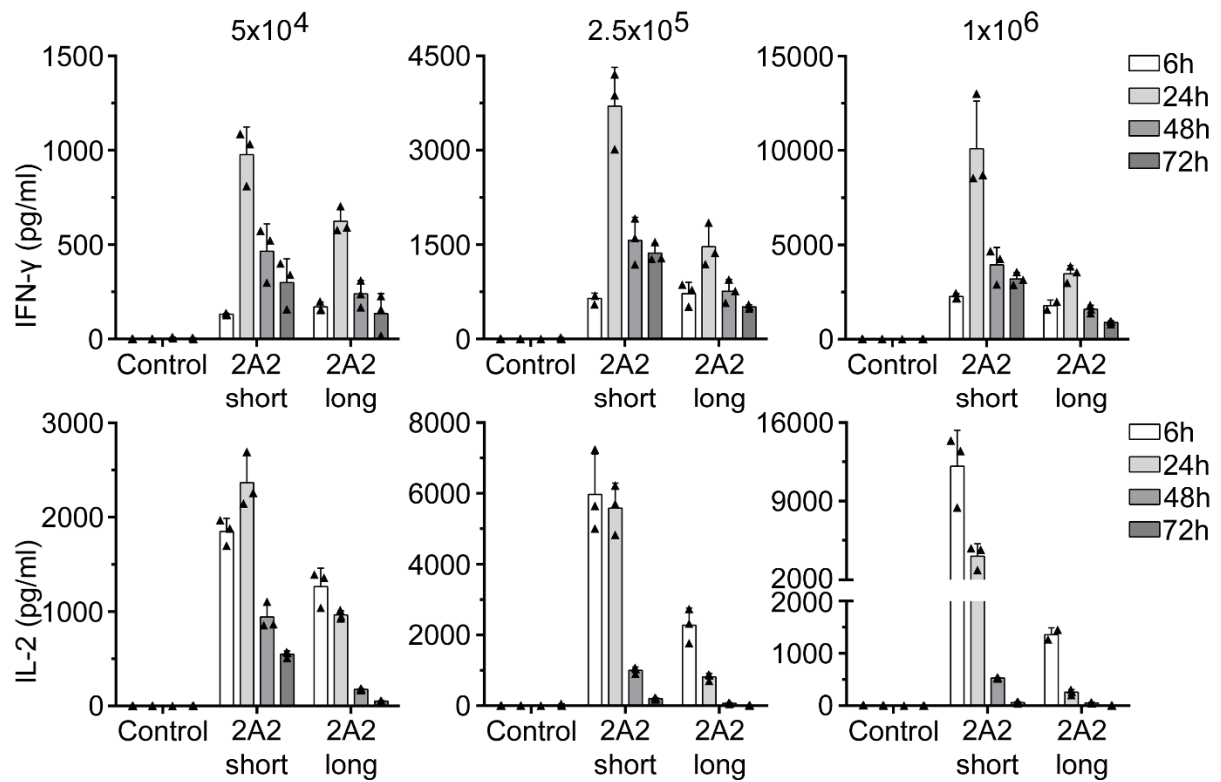

**Supplemental Figure 4. Variations in ROR1-CAR spacer design affect anti-tumor function in 3D lung cancer models.** ELISA-based quantification of IFN- $\gamma$  and IL-2 from supernatants collected at the indicated time point from static tumor models treated for 72 h with increasing numbers of CD8<sup>+</sup> unmodified control T-cells or ROR1-CAR T-cells with 2A2 targeting domain and either a short (IgG4-Fc hinge) or long (IgG4-Fc hinge-C<sub>H2</sub>-C<sub>H3</sub>) spacer domain. Data are presented as arithmetic mean of three cell crowns from n=1 experiment + SD.

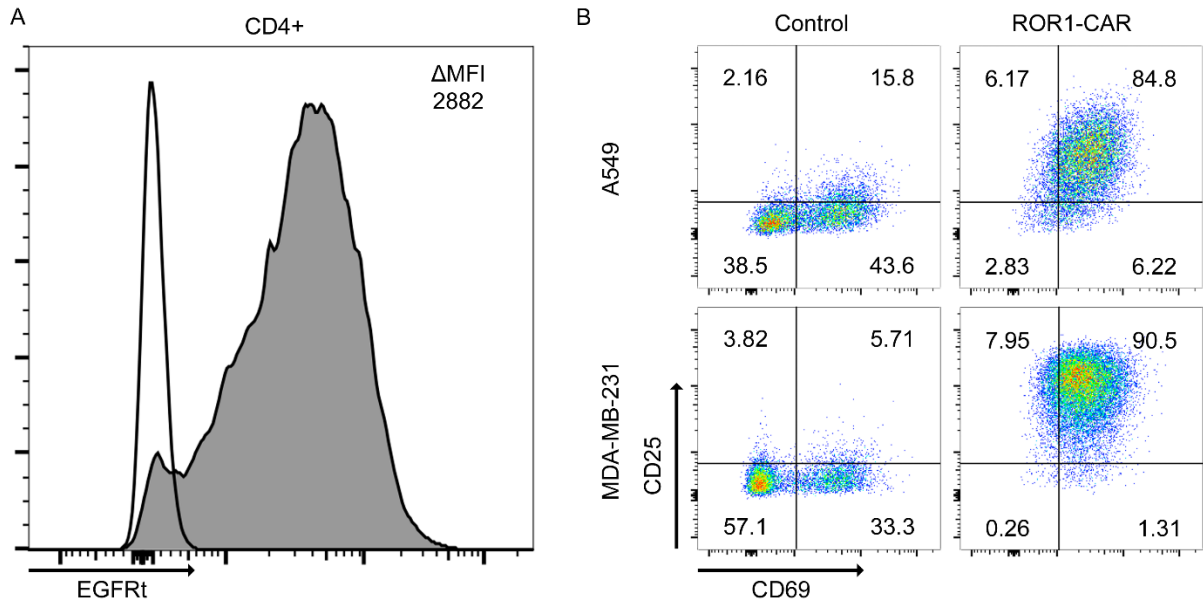

**Supplemental Figure 5. Phenotypic analysis of CD4<sup>+</sup> T-cells.** **A**, Expression of EGFRt transduction marker on CD4<sup>+</sup> T-cells prior to functional testing.  $\Delta$ MFI depicts the difference in geometric mean fluorescence intensity between unmodified control T-cells and ROR1-CAR T-cells. **B**, After five days of treatment, CD4<sup>+</sup> T-cells from supernatants were analyzed for expression of activation markers (CD25 and CD69) by flow cytometry. One representative plot of n=4 experiments is shown.
